# Supplementary material
Source: Springer Nature journal article supplement (https://www.springermedizin.de/resource/supplementary/12982_2007_53_MOESM29_ESM.pdf/9604370)
Supplement: MOESM29 [file 9604370]

Open Access for the non-English-speaking world: Overcoming the language barrier.

غیر انگریزی بولتی دنیا کے لئے کھلی پہنچ: لسانی # یوں کو عبور کرنے کے راستے

Author: Isaac Chun-Hai FUNG

مصنف: آئی۔ سی۔ چن ہائی فننگ

Abstract

یہ ادارہ سائنسی تبادلہ خیال میں حالیہ کھلی پہنچ کی مہم (Open Access Movement) کے وجود دھونے والی زبانی اور ترجمہ سے متعلق دشواریوں کو اجاگر کر رہا ہے۔ انگریزی میں شائع ہونے والے سائنسی +وں کے لئے لسانی دشواریوں کو حل کرنے کے چار راستے ہیں۔ (۱) مصنف خود (abstract) دوسری زبان میں مہیا کریں۔ (۲) Wiki open ترجمہ۔ (۳) بین الاقوامی مترجم جماعت (۴) دوسری زبان میں اشاعت - Emerging Themes in Epidemiology اعلان کر رہا ہے کہ وہ مصنف کا مہیا کردہ زبان میں بطور اخافی file منظور کرے گا۔
